# Supplementary material for: Luminescent down-shifting CsPbBr3 perovskite nanocrystals for flexible Cu(In,Ga)Se2 solar cells
Source: Royal Society of Chemistry journal article supplement (doi:10.1039/c9nr06041c), 2019-11-28
Supplement: c9nr06041c1.pdf [file c9nr06041c1.pdf]

## Supporting Information

### **Luminescent down-shifting CsPbBr<sub>3</sub> perovskite nanocrystal for flexible Cu(In,Ga)Se<sub>2</sub> solar cells**

Ye-Chan Kim,<sup>†</sup> Ho-Jung Jeong,<sup>‡</sup> Sung-Tae Kim,<sup>†</sup> Young Hyun Song,<sup>‡</sup> Bo Young Kim,<sup>‡</sup> Jae Pil Kim,<sup>‡</sup> Bong Kyun Kang,<sup>§</sup> Ju-Hyung Yun,<sup>||</sup> Jae-Hyung Jang<sup>\*†</sup>

<sup>†</sup> School of Electrical Engineering and Computer Science, Gwangju Institute of Science and Technology, Gwangju 500-712, Republic of Korea,

<sup>‡</sup> Lighting Materials and Components Research Center, Korea Photonics Technology Institute, Gwangju 61007, Republic of Korea

<sup>§</sup> Nano Materials and Components Research Center, Korea Electronics Technology Institute, Seongnam 463-816, Republic of Korea

<sup>||</sup> Department of Electrical Engineering, Incheon National University, Yeonsu-gu, Incheon 406-772, Republic of Korea

Corresponding Author

Jae-Hyung Jang

\* E-mail: [jjang@gist.ac.kr](mailto:jjang@gist.ac.kr)

### Crystallinity of CsPbBr<sub>3</sub> perovskite nanocrystals

To confirm the crystallinity of CsPbBr<sub>3</sub> perovskite nanocrystals, X-ray diffraction (XRD) pattern was measured by using X-ray diffractometer (X'pert PRO, PANalytical). The XRD pattern of the CsPbBr<sub>3</sub> perovskite nanocrystals is shown in Figure S1 of CsPbBr<sub>3</sub> structure. The three strong peaks of (101), (121), and (202) are observed at 15.14°, 21.40°, and 30.70°, respectively. Considering that the XRD pattern is well matched with JCPDS 18-0364, the CsPbBr<sub>3</sub> perovskite nanocrystals in this study are highly crystallized.

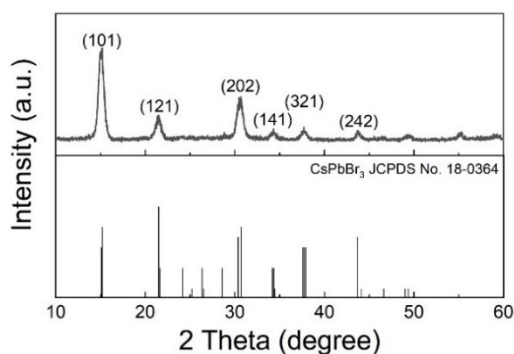

**Figure S1.** XRD pattern of CsPbBr<sub>3</sub> perovskite nanocrystals

### Optical transmittance of CsPbBr<sub>3</sub> perovskite

The optical transmittance of the 760-nm-thick CsPbBr<sub>3</sub> perovskite on top of borosilicate glass was measured by using UV–VIS–IR spectrophotometer. The transmittance of the CsPbBr<sub>3</sub> perovskite in Figure S2 shows that it is higher than 90% in long wavelength range between 520 and 1200 nm, but it decreases to 38% in wavelength range shorter than 520 nm due to the light absorption by CsPbBr<sub>3</sub> perovskite.

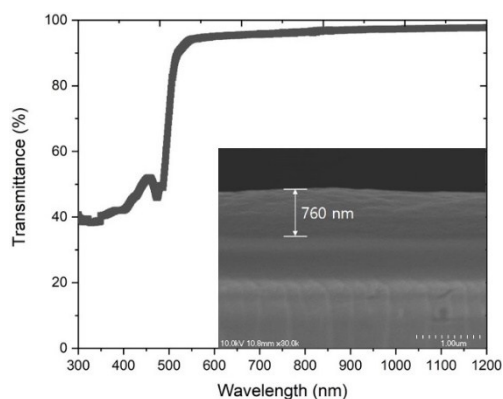

**Figure S2.** The optical transmittance of the 760-nm-thick CsPbBr<sub>3</sub> perovskite. The inset figure shows the cross sectional SEM image of the CsPbBr<sub>3</sub> perovskite thin film on top of borosilicate glass.

### Refractive index spectrum of CsPbBr<sub>3</sub> perovskite

The refractive index of the CsPbBr<sub>3</sub> perovskite was measured by using ellipsometer (Uvisel, HORIVA). The measured refractive index of the CsPbBr<sub>3</sub> perovskite is shown in Figure S3. Refractive index decreases as the wavelength increases beyond 500 nm and reaches 1.82 at wavelength of 800 nm. From the refractive index spectrum, it was confirmed that CsPbBr<sub>3</sub> perovskite luminescent down-shifting (LDS) layer act as an anti-reflection coating because the refractive index of CsPbBr<sub>3</sub> perovskite is lower than that of ZnO based transparent conductive oxide (TCO) layer at wavelengths longer than 500 nm<sup>1</sup>.

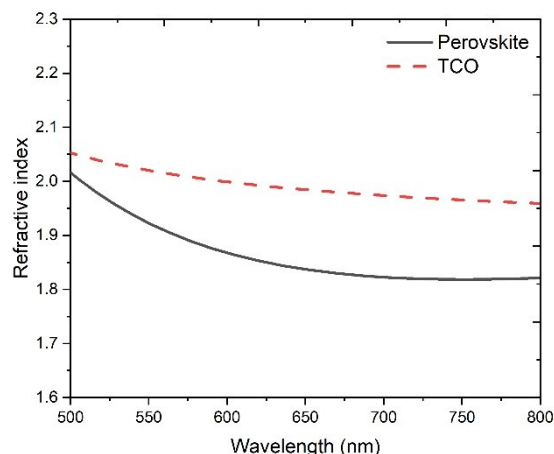

**Figure S3.** Refractive index spectra of the CsPbBr<sub>3</sub> perovskite and TCO layer.

### Comparison of surface reflectance spectra of the flexible CIGS solar cell with and without CsPbBr<sub>3</sub> perovskite LDS layer

The surface reflectance spectra of the flexible CIGS solar cell with and without CsPbBr<sub>3</sub> perovskite LDS layer are compared in Figure S4. Surface reflectance of the flexible CIGS solar cell with CsPbBr<sub>3</sub> perovskite LDS layer is reduced in the wavelength range between 333 nm and 1072 nm compared to that of the conventional flexible CIGS solar cell without LDS layer.

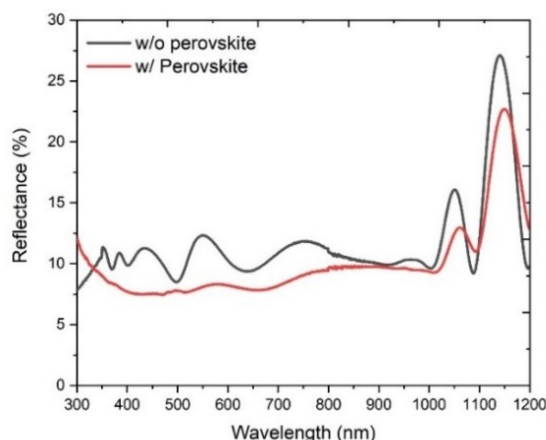

**Figure S4.** Surface reflectance spectra of the flexible CIGS solar cell with and without CsPbBr<sub>3</sub> perovskite nanocrystals

## Reference

- 1 W. L. Bond, J. Appl. Phys., 1965, 36(5), 1674-1677.
